# Supplementary material for: The African Database of Hydrometric Indices (ADHI)
Source: Copernicus journal article supplement (doi:10.5194/essd-2020-281), 2020-11-19
Supplement: Supplementary file [file essd-2020-281-AC1-supplement.pdf]

Tramblay et al. present the African Database of Hydrometric Indices (ADHI), a database containing streamflow metrics and metadata for a large sample of African catchments. They describe how the database was created, what it contains, and how the database can be accessed.

They also provide some background information and discuss potential uses of the database. The paper is well organised and mostly well written. The idea of providing a large hydrometric database for Africa is a very welcome one and within the scope of ESSD. While I think that the paper (and the database) could be published with only minor revisions, I am also left with the feeling that the database could be made more attractive by expanding it (more signatures, more metadata, etc.). I leave it up to the authors to decide whether to expand the dataset or not, but below I provide some comments on why I think this would be helpful.

We would like to thank you for this positive evaluation of the database and the corresponding data paper. We increased the number of hydrological signatures present in the database, by using the TOSHH toolbox recently released ([https://sebastiangnann.github.io/TOSHH\\_development/p2\\_signatures.html](https://sebastiangnann.github.io/TOSHH_development/p2_signatures.html)).

We also provided the catchment boundaries and additional attributes such as land cover and mean precipitation and evapotranspiration. These new files will appear shortly in the online repository.

#### **Major comments:**

**The title is clear, but when I first read the abstract, I thought that this database also contains streamflow time series. I think it should be made clearer in the abstract that the database does not contain any streamflow time series.**

We modified the abstract and added “This new African Database of Hydrometric Indices (ADHI) provides a wide range of hydrometric indices and hydrological signatures computed from different sources of data carefully checked for quality control”.

**I am curious to hear about the authors’ experiences with the data owners. What are the main reasons for not allowing to share the (raw) data? This does not have to be part of the paper, but I would be curious to know.**

Different problems can be encountered for data access. Frequently, the organizations in charge of collecting and monitoring hydrological measurements do not have a standardized procedure (website or other) for distributing data. It is therefore often necessary to establish a bilateral research agreement to access the data. In addition, for some organizations, the data is not free and processing fees do apply.

**I think providing more hydrological metrics/signatures would make the database more attractive. Most of the metrics provided are statistical metrics, with somewhat limited use for hydrological (process) studies. There is a wide range of potentially more meaningful signatures (e.g. Addor et al., 2018; or see McMillan, 2020, for a review focusing on process-based signatures).**

We expanded the range of signatures considered, using the TOSHH toolbox recently released, and added the references suggested. The use of this toolbox ensures a consistent calculation of the indices across different datasets and projects. We focus on the indices requiring discharge measurements only, and added signatures about base flow, statistical properties of discharge (skewness, autocorrelation etc.) and also time series of monthly and percentile-based indices.

We choose to focus on the indices requiring discharge only, since there is no consensus on the best precipitation product over Africa, from station-based datasets (CRU, GPCC, REGEN...) or satellite-based products (TRMM, GPM, CHIRPS etc.).

To clearly stress this point in the manuscript we added this section:

To document the mean annual precipitation and evapotranspiration at the catchment scale, the CRU4 dataset has been considered (Harris et al., 2020). However, without long-term and homogeneous ground monitoring networks over the African continent, no best precipitation database could be identified for Africa as a whole (Sylla et al., 2013; Beck et al., 2017; Awange et al., 2019; Satgé et al., 2020). For some regions, such as Northern or Equatorial Africa, there are large differences between different remote sensing or gauged-based precipitation products (Gehne et al., 2016; Harrison et al., 2019; Nogueira, 2020), in particular for extreme precipitation events. This is the reason why we choose to provide only time-averaged precipitation and evapotranspiration, and for a particular application to a given catchment, the user is advised to check the best available precipitation product for that area.

**Similarly, while the database contains some metadata, there is potential to provide much more information. You already calculated catchment shapefiles, which could be shared as well. You could also use the shapefiles to extract more catchment characteristics from global (or African) data products. For example, there are products for P, T, PET, and for many catchment attributes, which would make the database more attractive (in my opinion).**

We re-processed the catchment delineation and we now provide in the dataset the catchment boundaries in a Shapefile format. We also added mean precipitation, temperature and PET from CRU, averaged over a common time period for all basins. We also added the percentage of the main land cover classes from ESA Land cover 2018, as basin descriptors in addition to elevation characteristics.

**Otherwise, it might be a bit hard to compete with recently published datasets that provide time series and various catchment attributes, despite the geographically unique coverage of your database.**

There is no competition here. Different databases offer different kind of data, contributing to open data for scientific research. We hope this new dataset that we are providing will be helpful primary for African students and researchers that often have difficulties in accessing this kind of data.

**Since the original time series are not accessible, there is no way to reproduce the derived indices. But I think that it would be helpful if you could share the code used to create the database.**

We homogenized the computations of the indices using mostly the TOSHH toolbox, that is already available online. We are currently working on a specific code to automate the whole process, with the aim to provide to end-users or basin agencies the capacity to produce the hydrometric indices themselves with new data (mainly by facilitating the pre- and post-processing of data files, since most of the codes are already available in the TOSHH toolbox).

**It would be helpful to discuss a little bit more quantitatively how this database differs for example from GSIM. How many more catchments are in there? This will make it easier for users to see the advantages of that dataset.**

We agree, and added a map and additional text to better explain the data sources and also the comparison with GSIM.

In this ADHI dataset, we combined 672 stations from SIEREM, 794 from the GRDC so a total of 1466 with at least 10 years of data between 1950 and 2018 and a mean record length of 33.3 years and half of the stations have more than 30 years of data.

In GSIM, there are 979 stations in Africa, with record length from 1 year to 110 years until 2015, and a mean record length of 33.8 years.

The major difference is that GSIM will not be updated, when ADHI will.

**There are a few language errors and some unclear sentences. It's mostly minor, but I think proofreading the paper again would be helpful. I made some comments on that in the list below.**

**Minor comments:**

**L:85-86: “carefully checked for quality control”. I would rephrase this – you do a quality control, that is, you check for quality. But you don't check for quality control.**

We changed to: “..different sources of data after a quality control”.

**L.86-87: This first suggested to me that the database also includes the discharge data, which (unfortunately) it doesn't. I would suggest rephrasing it so that this is clear. The same holds true for the following sentences.**

We changed to: “This new African Database of Hydrometric Indices (ADHI) provides a wide range of hydrometric indices and hydrological signatures”

**L.104: “aquifers” – remove the “s”**

done

**L.126: You mentioned two main reasons, but you then list 3 points.**

Replaced by “several reasons”

**L.134: I would suggest writing 20th century instead of using Roman numerals.**

changed

**L.132-136: That sentence is quite long and could be simplified/split.**

We rephrased the sentence to shorten it.

**L.144: The reference Gnann et al. (2020) doesn't really fit here as the study does not look at climate change or human activities. It would fit better into the next sentence after Westerberg et al. (2020).**

done

**L.181: "A careful inspection" – please be more explicit here.**

We replaced "careful" by "visual"

**L.187: "After this data quality processing step,...". Do you mean all the steps described above, that is the minimum length requirement, checking for duplicate time series, and merging with the GRDC?**

yes

**L.197: Replace "About" with some other word, it sounds a bit awkward.**

We replaced it by 'for'

**L.202-205: I would suggest rephrasing that sentence. I think I understand what you want to say here, but it's a bit unclear.**

We rephrased the sentence to:

For only a few data points in the discharge time series, some obvious errors were detected with daily discharge exceeding by several orders of magnitude the median flow. In these cases, the data has been reported as missing data in an absence of an objective criterion to correct the record.

**L.219-220: "manyfold" instead of "many folds"**

Changed

**L.230 and others: perhaps write southern Africa to clearly distinguish between the south of Africa and South Africa. Technically, the capitalisation should suffice, but it can be a bit confusing.**

Changed, we distinguish between southern Africa, the region, and South Africa, the country.

**L.231 "includes" remove the "s"**

Removed

**L.283: I'm not sure what you mean by "relative indices computed with a base period as reference, such as standardized drought indices." To which indices do you refer to?**

We removed this sentence

**L.309: Here you use "indexes", earlier on "indices"**

We replaced by 'indices'

**L.316: I am not entirely sure about the purpose of this paragraph. It reads like a discussion, which I didn't expect in that section. But it's a bit vague and doesn't really help the reader (in my opinion).**

We moved this part to the conclusion. The main idea of this part was to explain that other composite indices can be computed from the ones supplied in the present ADHI database.

**L.351: "summary.txt file" is called "summary.tab" in the database**

Changed

**L.360: "contains" – remove the "s"**

removed

**L.380: do you mean "organisations" here rather than "organisms"?**

We replaced by 'institutes'

**L. 418-420: Could you provide links (if they exist) to the GRDC and the SIEREM database websites? (Obviously the data cannot be accessed that way, but providing contact info of the data owners would be helpful.)**

We added the two websites

**Figure 1: In the caption you mention twice that regulated basins are basins with dams.**

We updated figure 1

## **References**

**Addor, N., Nearing, G., Prieto, C., Newman, A.J., Le Vine, N. and Clark, M.P., 2018. A ranking of hydrological signatures based on their predictability in space. Water Resources Research, 54(11), pp.8792-8812.**

**McMillan, H., 2020. Linking hydrologic signatures to hydrologic processes: A review. Hydrological Processes, 34(6), pp.1393-1409.**

These references have been added to justify the selection of indices/signatures.
